# Supplementary material for: Efficient metal borate catalysts for oxidative dehydrogenation of propane
Source: Royal Society of Chemistry journal article supplement (doi:10.1039/d1cy01792f), 2022-01-01
Supplement: d1cy01792f1.pdf [file d1cy01792f1.pdf]

## Efficient metal borate catalysts for oxidative dehydrogenation of propane

Heming Qian,<sup>a</sup> Fulin Sun,<sup>a</sup> Wei Zhang,<sup>\*a</sup> Chao Huang,<sup>b</sup> Yingjun Wang,<sup>a</sup> and Kegong Fang<sup>\*b</sup>

a. College of Chemistry and Chemical Engineering, Northeast Petroleum University, Daqing 163318, China.  
E-mail: [99095871@qq.com](mailto:99095871@qq.com)

b. State Key Laboratory of Coal Conversion, Institute of Coal Chemistry, Chinese Academy of Sciences, Taiyuan 030001, China. E-mail: [kgfang@sxicc.ac.cn](mailto:kgfang@sxicc.ac.cn)

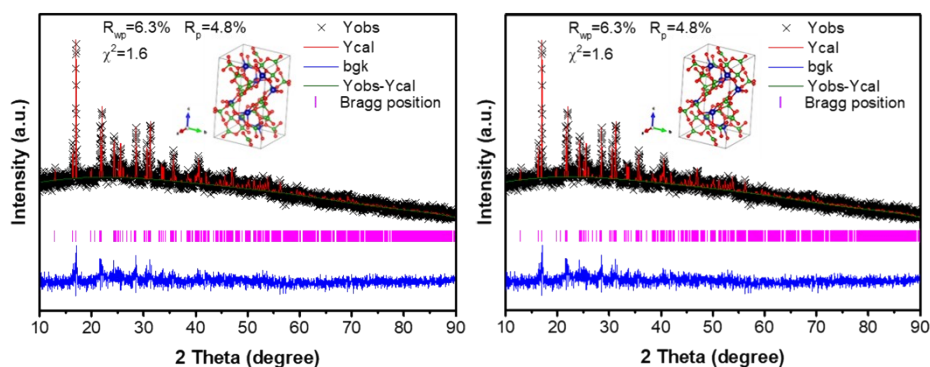

Figure S1. Rietveld fitting diagram of XRD of the catalysts: (a)  $\text{CoB}_4\text{O}_7$ , (b)  $\text{Ni}_3\text{B}_2\text{O}_6$ .

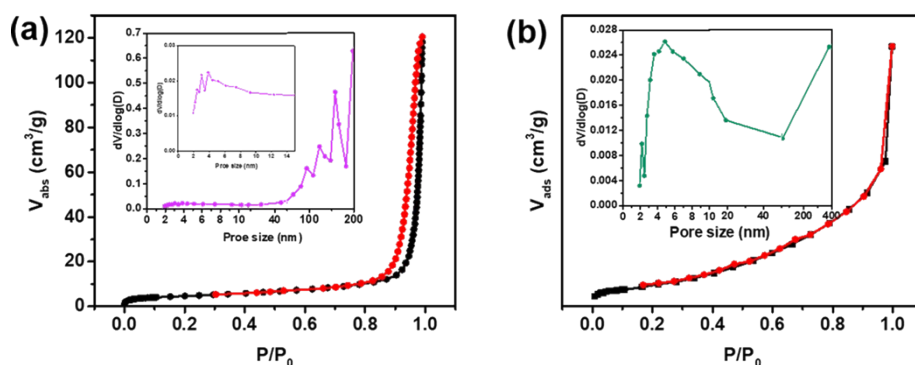

Figure S2.  $\text{N}_2$  adsorption-desorption isotherms and pore size distribution of  $\text{CoB}_4\text{O}_7$  and  $\text{Ni}_3\text{B}_2\text{O}_6$  catalysts: (a)  $\text{CoB}_4\text{O}_7$ , (b)  $\text{Ni}_3\text{B}_2\text{O}_6$ .

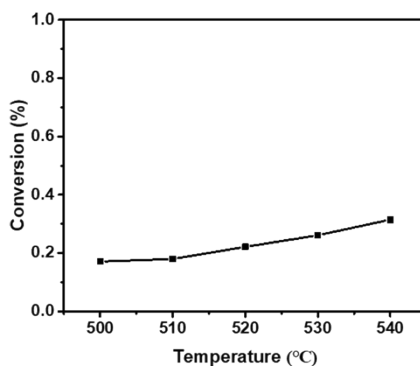

Figure S3. Influence of temperature on the ODHP conversion of propane over quartz; Reaction conditions: temperature, 490 °C; quartz weight, 600 mg; gas feed  $\text{C}_3\text{H}_8/\text{O}_2/\text{N}_2$  with 2.5:1:4 volume ratio; flow rate, 30  $\text{mL min}^{-1}$ .

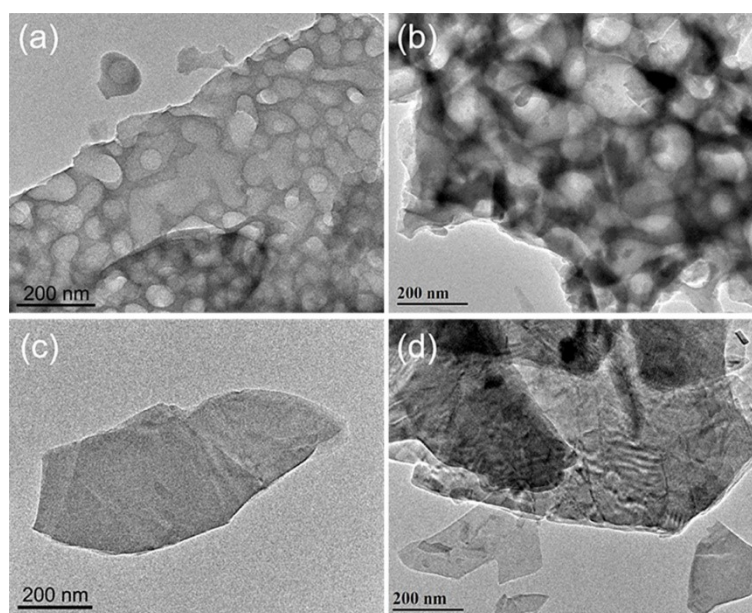

Figure S4. TEM images of  $\text{CoB}_4\text{O}_7$  and  $\text{Ni}_3\text{B}_2\text{O}_6$  catalysts: (a) fresh  $\text{CoB}_4\text{O}_7$ , (b) spent  $\text{CoB}_4\text{O}_7$ , (c) fresh  $\text{Ni}_3\text{B}_2\text{O}_6$ , (d) spent  $\text{Ni}_3\text{B}_2\text{O}_6$ .

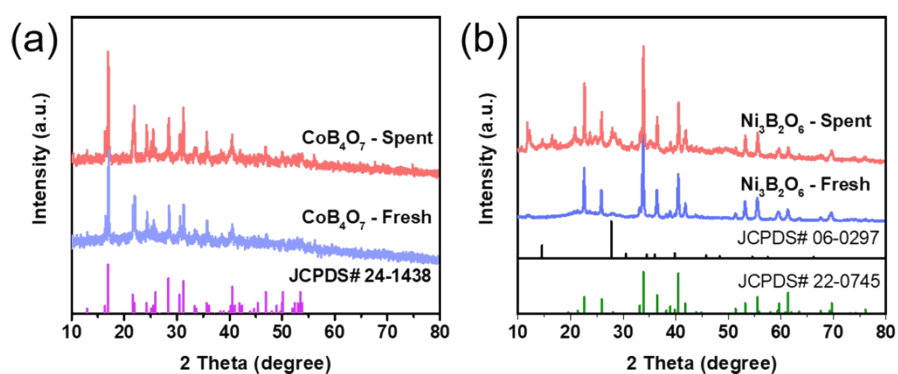

Figure S5. XRD patterns of fresh and spent catalysts: (a)  $\text{CoB}_4\text{O}_7$ , (b)  $\text{Ni}_3\text{B}_2\text{O}_6$ .

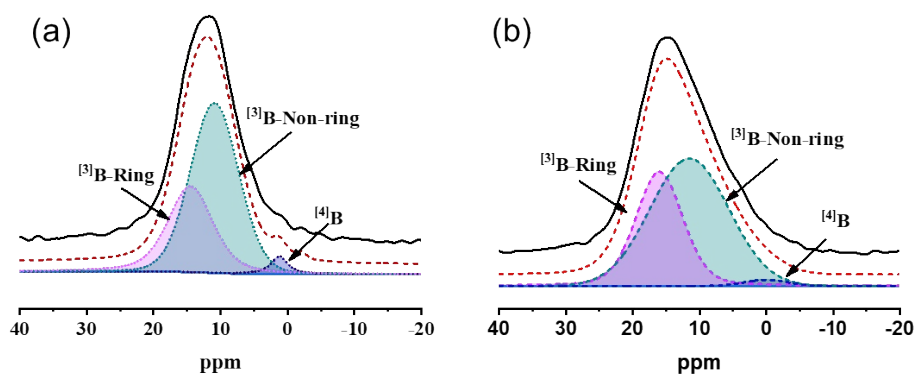

Figure S6.  $^{11}\text{B}$  MAS-NMR spectra (14.1 T) of the borate catalysts: (a)  $\text{CoB}_4\text{O}_7$ -Fresh, (b)  $\text{CoB}_4\text{O}_7$ -Spent.

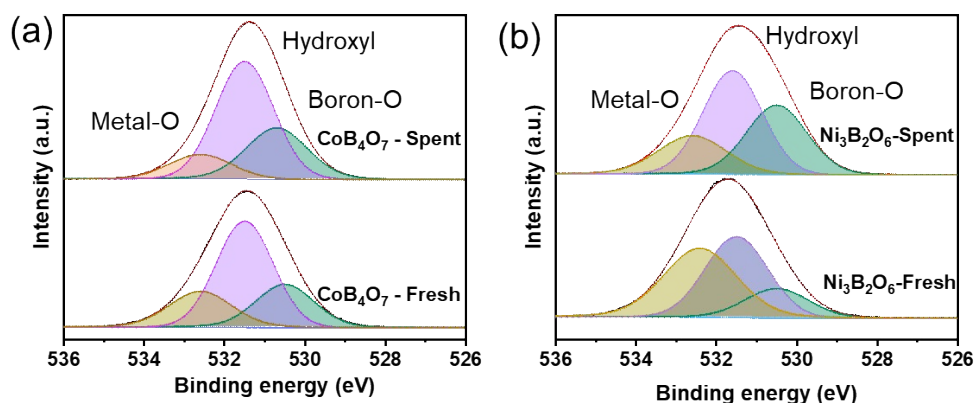

Figure S7. B 1s XPS spectra of fresh and spent catalysts: (a)  $\text{CoB}_4\text{O}_7$ , (b)  $\text{Ni}_3\text{B}_2\text{O}_6$ .

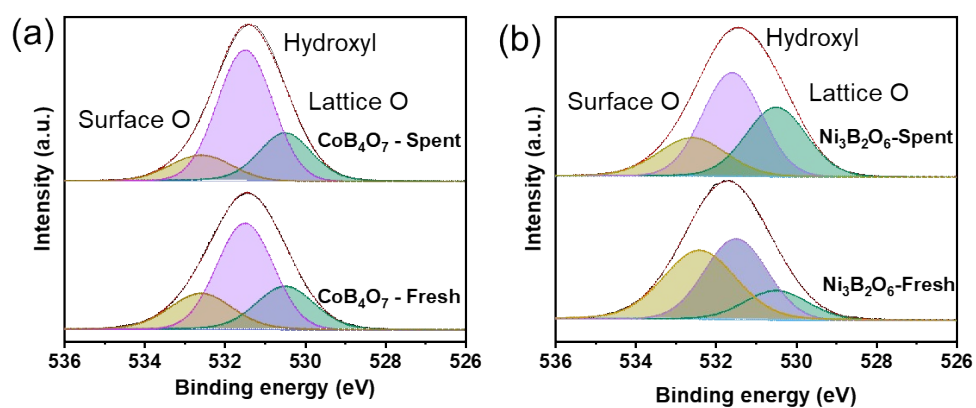

Figure S8. O 1s XPS spectra of fresh and spent catalysts: (a)  $\text{CoB}_4\text{O}_7$ , (b)  $\text{Ni}_3\text{B}_2\text{O}_6$ .

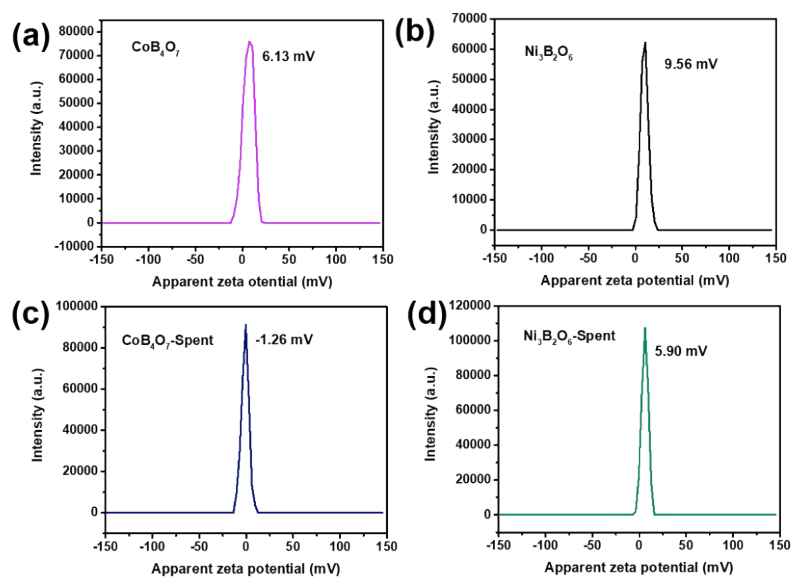

Figure S9. Zeta potentials of the catalysts.

Table S1 Catalytic performance of the CoB<sub>4</sub>O<sub>7</sub> and Ni<sub>3</sub>B<sub>2</sub>O<sub>6</sub> catalyst in comparison with representative ODHP catalysts in the literatures.

| Num. | Catalysts                                            | Temp<br>(°C) | WHSV<br>(g <sub>C<sub>3</sub>H<sub>8</sub></sub> g <sub>cat</sub> <sup>-1</sup> h <sup>-1</sup> ) | Conversion (%)                | Selectivity (%)               |                               |                 |      |                 |         | Yield (%)                     | Ref.      |
|------|------------------------------------------------------|--------------|---------------------------------------------------------------------------------------------------|-------------------------------|-------------------------------|-------------------------------|-----------------|------|-----------------|---------|-------------------------------|-----------|
|      |                                                      |              |                                                                                                   | C <sub>3</sub> H <sub>6</sub> | C <sub>3</sub> H <sub>8</sub> | C <sub>2</sub> H <sub>4</sub> | CH <sub>4</sub> | CO   | CO <sub>2</sub> | Olefins | C <sub>3</sub> H <sub>6</sub> |           |
| 1    | h-BN                                                 | 490          | 3.96                                                                                              | 14.0                          | 79.0                          | 12.0                          | -               | -    | -               | 91.0    | 11.1                          | 1         |
| 2    | h-BN                                                 | 560          | -                                                                                                 | 11.3                          | 71.8                          | 20.0                          |                 |      |                 | 91.8    | 8.1                           | 2         |
| 3    | B                                                    | 490          | 90.0                                                                                              | 16                            | 77.9                          | 10.0                          | 1.4             | 6.6  | 3.6             | 87.9    | 12.4                          | 3         |
| 4    | NiB                                                  | 490          | 8.04                                                                                              | 6.1                           | 85.4                          | 9.3                           | 2.0             | 2.2  | 0.3             | 94.7    | 5.2                           | 3         |
| 5    | Co <sub>2</sub> B/Co <sub>3</sub> B                  | 490          | 6.92                                                                                              | 3.2                           | 87.9                          | 7.9                           | 1.8             | 1.5  | 0.2             | 95.7    | 2.8                           | 3         |
| 6    | BOS-10                                               | 500          | 9.4                                                                                               | 31.5                          | 64.0                          | 19.1                          | 0               | 14.8 | 2.1             | 87.4    | 20.1                          | 4         |
| 8    | BPO <sub>4</sub> (bulk)                              | 550          | 9.4                                                                                               | 15.3                          | 79.8                          | 11.2                          | -               | -    | -               | 91.0    | 12.2                          | 5         |
| 9    | BPO <sub>4</sub> (OM)                                | 515          | 9.4                                                                                               | 14.3                          | 82.5                          | 9.0                           | -               | -    | -               | 91.5    | 11.8                          | 5         |
| 10   | Boronhyperdoped silicon                              | 450          | 28.2                                                                                              | 10.6                          | 64.1                          | 7.2                           | -               | 9.7  | 2.5             | 71.3    | 6.8                           | 6         |
| 15   | Ni <sub>3</sub> B <sub>2</sub> O <sub>6</sub>        | 510          | 5.9                                                                                               | 6.3                           | 81.9                          | 12.0                          | 2.3             | 3.3  | 0.5             | 91.9    | 5.2                           | This work |
| 16   | Ni <sub>3</sub> B <sub>2</sub> O <sub>6</sub> -200 h | 510          | 5.9                                                                                               | 13.2                          | 77.4                          | 16.4                          | 3.1             | 2.4  | 0.5             | 93.7    | 10.2                          | This work |
| 18   | CoB <sub>4</sub> O <sub>7</sub>                      | 490          | 5.9                                                                                               | 9.1                           | 81.7                          | 11.7                          | 1.5             | 4.4  | 0.7             | 93.4    | 7.4                           | This work |
| 19   | CoB <sub>4</sub> O <sub>7</sub> -200 h               | 490          | 5.9                                                                                               | 17.3                          | 74.3                          | 17.1                          | 1.8             | 6.2  | 0.6             | 89.5    | 12.8                          | This work |

Table S2 The content of three types of boron species in fresh and spent catalysts measured at 14.1 T

| Samples                                       |       | Ratio of boron species (%) |                           |                  |
|-----------------------------------------------|-------|----------------------------|---------------------------|------------------|
|                                               |       | <sup>[3]</sup> B-ring      | <sup>[3]</sup> B non-ring | <sup>[4]</sup> B |
| CoB <sub>4</sub> O <sub>7</sub>               | Fresh | 33.1                       | 63.6                      | 3.3              |
|                                               | Spent | 36.5                       | 58.7                      | 4.8              |
| Ni <sub>3</sub> B <sub>2</sub> O <sub>6</sub> | Fresh | 32.1                       | 63.8                      | 4.1              |
|                                               | Spent | 35.9                       | 62.5                      | 1.7              |

Table S3 Summary of XPS data for the CoB<sub>4</sub>O<sub>7</sub> and Ni<sub>3</sub>B<sub>2</sub>O<sub>6</sub> catalysts

| Samples                                       |       | Content (%) |      |      |      |
|-----------------------------------------------|-------|-------------|------|------|------|
|                                               |       | Co          | Ni   | O    | B    |
| CoB <sub>4</sub> O <sub>7</sub>               | Fresh | 5.0         | -    | 53.3 | 41.6 |
|                                               | Spent | 5.0         | -    | 53.5 | 41.5 |
| Ni <sub>3</sub> B <sub>2</sub> O <sub>6</sub> | Fresh | -           | 4.3  | 53.6 | 42.1 |
|                                               | Spent | -           | 10.0 | 50.0 | 40.0 |

Table S4 Summary of B 1s and O 1s XPS spectra data for the CoB<sub>4</sub>O<sub>7</sub> and Ni<sub>3</sub>B<sub>2</sub>O<sub>6</sub> catalysts

| Sample | Boron species (%) | Oxygen species (%) |
|--------|-------------------|--------------------|
|--------|-------------------|--------------------|

|                                               |       | M-B-O | B-O  | M-O  | OH   | B-O  |
|-----------------------------------------------|-------|-------|------|------|------|------|
| CoB <sub>4</sub> O <sub>7</sub>               | Fresh | 70.3  | 29.7 | 29.2 | 50.9 | 19.9 |
|                                               | Spent | 73.1  | 26.9 | 28.2 | 58.7 | 13.1 |
| Ni <sub>3</sub> B <sub>2</sub> O <sub>6</sub> | Fresh | 60.1  | 39.9 | 15.1 | 41.8 | 43.1 |
|                                               | Spent | 70.7  | 29.3 | 32.9 | 46.2 | 20.9 |

## References

1. J. T. Grant, C. A. Carrero, F. Goeltl, J. Venegas, P. Mueller, S. P. Burt, S. E. Specht, W. P. McDermott, A. Chierigato and I. Hermans, *Science*, 2016, **354**, 1570-1573.
2. J. S. Tian, J. Q. Tan, M. L. Xu, Z. X. Zhang, S. L. Wan, S. Wang, J. D. Lin and Y. Wang, *Sci Adv*, 2019, **5**.
3. J. T. Grant, W. P. McDermott, J. M. Venegas, S. P. Burt, J. Micka, S. P. Phivilay, C. A. Carrero and I. Hermans, *Chemcatchem*, 2017, **9**, 3623-3626.
4. W.-D. Lu, D. Wang, Z. Zhao, W. Song, W.-C. Li and A.-H. Lu, *ACS Catalysis*, 2019, **9**, 8263-8270.
5. W.-D. Lu, X.-Q. Gao, Q.-G. Wang, W.-C. Li, Z.-C. Zhao, D.-Q. Wang and A.-H. Lu, *Chinese Journal of Catalysis*, 2020, **41**, 1837-1845.
6. J. Chen, P. Rohani, S. G. Karakalos, M. J. Lance, T. J. Toops, M. T. Swihart and E. A. Kyriakidou, *Chem Commun*, 2020, **56**, 9882-9885.
